# Supplementary material for: Primary exposure to Zika virus increases risk of symptomatic dengue virus infection with serotypes 2, 3, and 4 but not serotype 1
Source: bioRxiv or medRxiv preprint supplement (doi:10.1101/2023.11.29.23299187), 2023-11-30
Supplement: Supplementary file [file media-1.pdf]

## **SUPPLEMENTARY MATERIAL**

### **Primary exposure to Zika virus increases risk of symptomatic dengue virus infection with serotypes 2, 3, and 4 but not serotype 1**

Jose Victor Zambrana<sup>1,2†</sup>, Chloe M. Hasund<sup>3†</sup>, Rosemary A. Aogo<sup>3†</sup>, Sandra Bos<sup>4</sup>, Sonia Arguello<sup>1</sup>, Karla Gonzalez<sup>1,5</sup>, Damaris Collado<sup>1</sup>, Tatiana Miranda<sup>1</sup>, Guillermina Kuan<sup>1,6</sup>, Aubree Gordon<sup>2</sup>, Angel Balmaseda<sup>1,5</sup>, Leah Katzelnick<sup>3\*</sup>, Eva Harris<sup>4\*</sup>

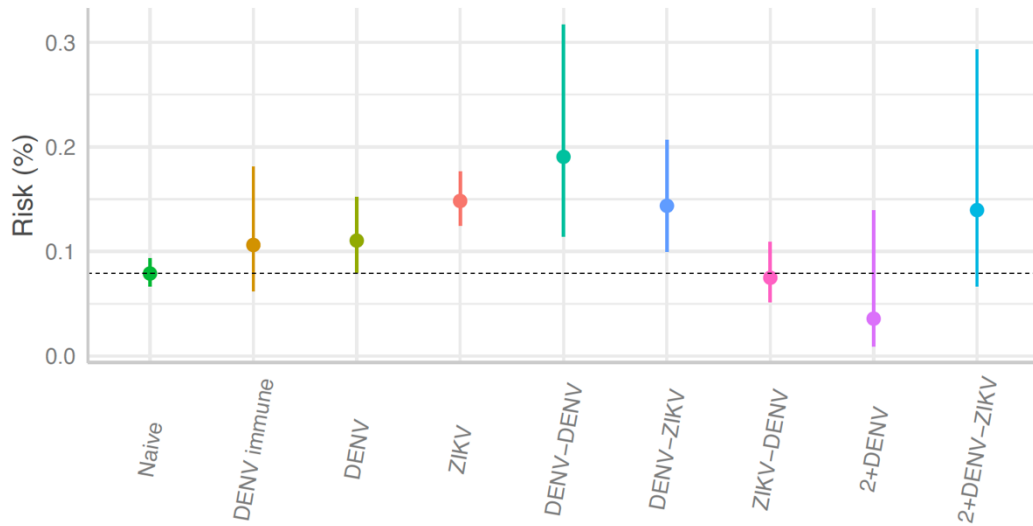

**Fig. S1. Risk of dengue differs by infection history on crude levels.** Crude risk of symptomatic DENV infection by prior DENV and ZIKV infection histories, 2022-2023.

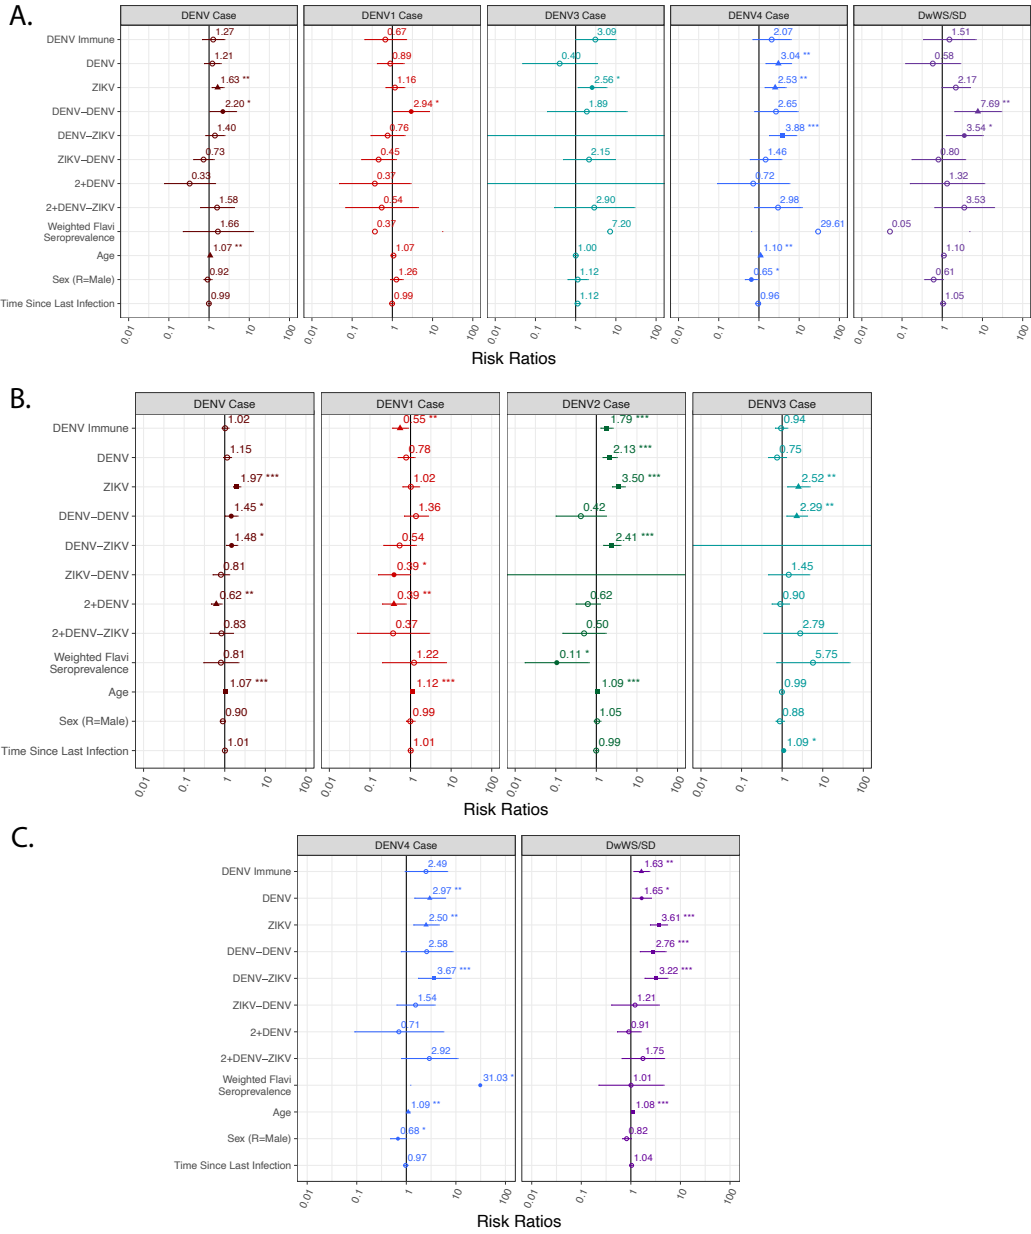

**Fig. S2. Prior infection history confers differential risk of symptomatic DENV1-4 considering baseline spatial risk.** Risks ratios of symptomatic and severe dengue by prior DENV and ZIKV infection histories including age-adjusted flavivirus seroprevalence of the prior year on the neighborhood level as a covariate (A) in the 2022-2023 epidemic season (B-C) in the entire cohort season (2004-2023).

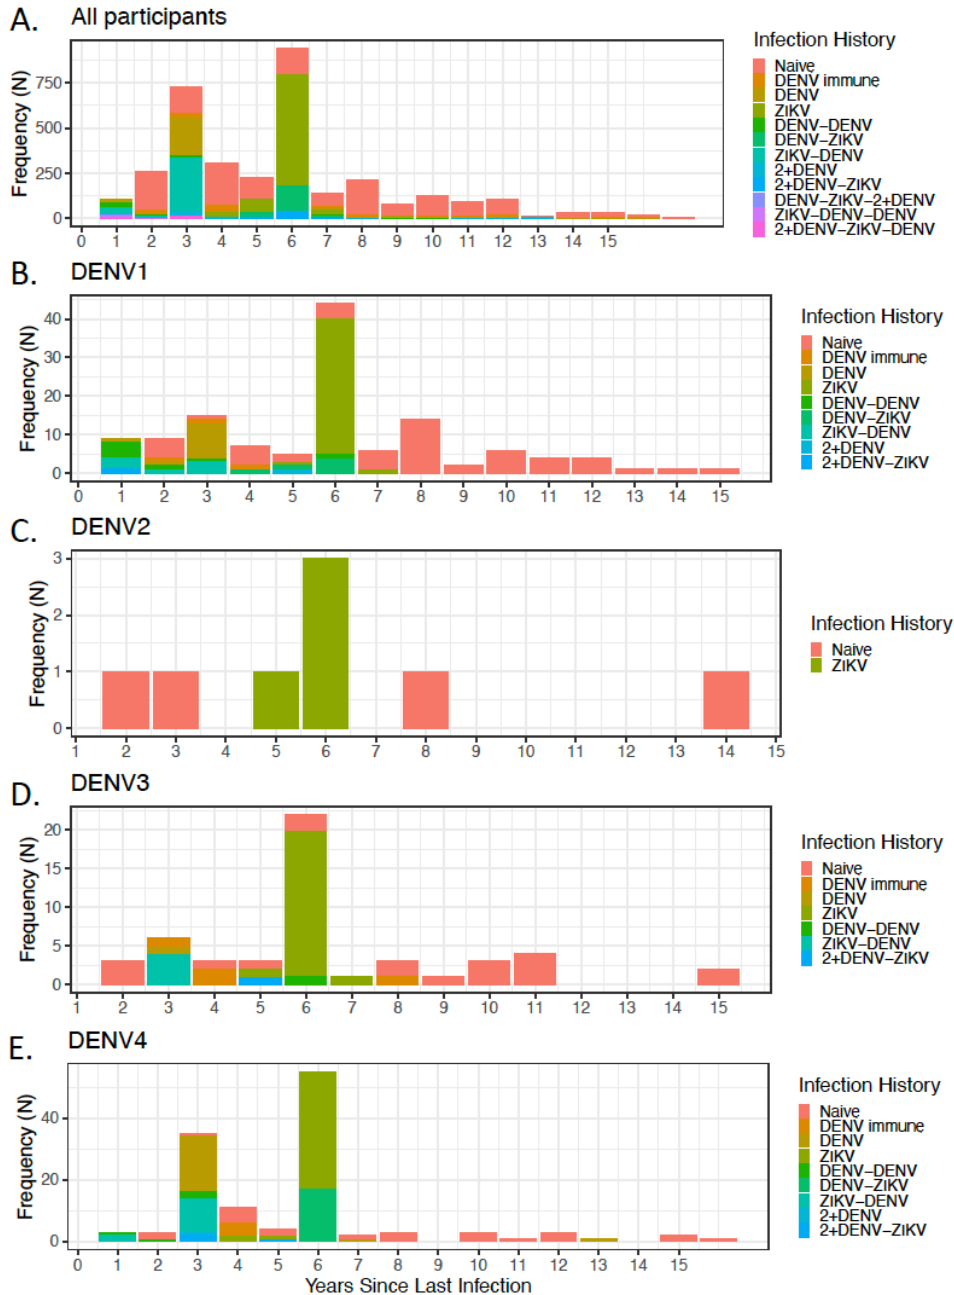

**Fig. S3. Most secondary infections in 2022 had DENV2 and/or ZIKV infections as a primary infection.** Frequency of DENV cases (A) and cases due to DENV1 (B), DENV2 (C), DENV3 (D), and DENV4 (E) infections in 2022 by years since last infection for each infection history. The flavivirus-naïve group contains years since entered the cohort.

**Table S1. Characteristics of participants in the Pediatric Dengue Cohort Study with documented infection histories, 2004-2023**

| Variable                             | DENV Cases                         |                                |                                |                                |                                |                                             | P-value <sup>2</sup> |
|--------------------------------------|------------------------------------|--------------------------------|--------------------------------|--------------------------------|--------------------------------|---------------------------------------------|----------------------|
|                                      | Overall,<br>N = 1,418 <sup>1</sup> | DENV1,<br>N = 294 <sup>1</sup> | DENV2,<br>N = 481 <sup>1</sup> | DENV3,<br>N = 310 <sup>1</sup> | DENV4,<br>N = 135 <sup>1</sup> | Dengue<br>Serology,<br>N = 178 <sup>1</sup> |                      |
| <b>Age</b>                           | 9.5 (6.8, 12.2)                    | 9.9 (7.4, 12.5)                | 9.5 (7.0, 12.1)                | 8.8 (6.0, 11.1)                | 11.9 (9.8, 14.3)               | 8.2 (5.7, 10.7)                             | <0.001               |
| <b>Sex</b>                           |                                    |                                |                                |                                |                                |                                             | 0.2                  |
| F                                    | 738 (53%)                          | 149 (51%)                      | 239 (50%)                      | 159 (52%)                      | 78 (58%)                       | 113 (58%)                                   |                      |
| M                                    | 677 (47%)                          | 142 (49%)                      | 239 (50%)                      | 148 (48%)                      | 56 (42%)                       | 82 (42%)                                    |                      |
| <b>DHF/DSS</b>                       | 66 (4.7%)                          | 8 (2.7%)                       | 30 (6.2%)                      | 28 (9.0%)                      | 0 (0%)                         | 0 (0%)                                      | <0.001               |
| <b>DwWS/SD</b>                       | 383 (27%)                          | 62 (21%)                       | 182 (38%)                      | 103 (33%)                      | 24 (18%)                       | 12 (6.1%)                                   | <0.001               |
| <b>Time Since Last Infection</b>     | 4.54<br>(3.00, 6.00)               | 5.36<br>(3.00, 8.00)           | 3.72<br>(3.00, 4.00)           | 4.70<br>(3.00, 6.00)           | 5.35<br>(3.00, 6.00)           | 4.58<br>(2.00, 7.00)                        | <0.001               |
| <b>Geometric Mean Titer (iELISA)</b> | 384 (2, 126)                       | 214 (2, 43)                    | 514 (2, 197)                   | 141 (2, 64)                    | 675 (2, 289)                   | 491 (2, 39)                                 | <0.001               |
| <b>Infection History</b>             |                                    |                                |                                |                                |                                |                                             |                      |
| Naive                                | 523 (38%)                          | 139 (49%)                      | 115 (24%)                      | 134 (45%)                      | 24 (19%)                       | 111 (58%)                                   |                      |
| DENV immune                          |                                    |                                |                                |                                |                                |                                             |                      |
| DENV                                 | 124 (9.0%)                         | 29 (10%)                       | 39 (8.2%)                      | 21 (7.1%)                      | 20 (16%)                       | 15 (7.9%)                                   |                      |
| ZIKV                                 | 306 (22%)                          | 39 (14%)                       | 180 (38%)                      | 21 (7.1%)                      | 41 (32%)                       | 25 (13%)                                    |                      |
| DENV-DENV                            | 41 (3.0%)                          | 13 (4.6%)                      | 2 (0.4%)                       | 18 (6.1%)                      | 4 (3.1%)                       | 4 (2.1%)                                    |                      |
| DENV-ZIKV                            | 71 (5.2%)                          | 6 (2.1%)                       | 43 (9.0%)                      | 0 (0%)                         | 17 (13%)                       | 5 (2.6%)                                    |                      |
| ZIKV-DENV                            | 26 (1.9%)                          | 7 (2.5%)                       | 0 (0%)                         | 4 (1.3%)                       | 13 (10%)                       | 2 (1.0%)                                    |                      |
| 2+DENV                               | 60 (4.4%)                          | 12 (4.3%)                      | 10 (2.1%)                      | 31 (10%)                       | 1 (0.8%)                       | 6 (3.1%)                                    |                      |
| 2+DENV-ZIKV                          | 11 (0.8%)                          | 1 (0.4%)                       | 3 (0.6%)                       | 1 (0.3%)                       | 3 (2.3%)                       | 3 (1.6%)                                    |                      |
| DENV-ZIKV-2+DENV                     | 0 (0%)                             | 0 (0%)                         | 0 (0%)                         | 0 (0%)                         | 0 (0%)                         | 0 (0%)                                      |                      |
| ZIKV-DENV-DENV                       | 0 (0%)                             | 0 (0%)                         | 0 (0%)                         | 0 (0%)                         | 0 (0%)                         | 0 (0%)                                      |                      |
| 2+DENV-ZIKV-DENV                     | 0 (0%)                             | 0 (0%)                         | 0 (0%)                         | 0 (0%)                         | 0 (0%)                         | 0 (0%)                                      |                      |

<sup>1</sup>Mean (IQR); n (%)

<sup>2</sup>Kruskal-Wallis rank sum test; Pearson's Chi-squared test

**Table S2. Estimated risk ratios of a dengue case by prior DENV and ZIKV infection histories, 2022-2023.**

| Predictors                  | DENV Case   |             |                  | DENV1 Case  |             |                  | DENV3 Case  |              |                  | DENV4 Case  |             |                  | DwWS/SD               |              |                  |
|-----------------------------|-------------|-------------|------------------|-------------|-------------|------------------|-------------|--------------|------------------|-------------|-------------|------------------|-----------------------|--------------|------------------|
|                             | Risk Ratios | CI          | p                | Risk Ratios | CI          | p                | Risk Ratios | CI           | p                | Risk Ratios | CI          | p                | Incidence Rate Ratios | CI           | p                |
| (Intercept)                 | 0.06        | 0.04 – 0.08 | <b>&lt;0.001</b> | 0.02        | 0.01 – 0.04 | <b>&lt;0.001</b> | 0.01        | 0.00 – 0.02  | <b>&lt;0.001</b> | 0.01        | 0.01 – 0.03 | <b>&lt;0.001</b> | 0.00                  | 0.00 – 0.01  | <b>&lt;0.001</b> |
| inf hist DD [DENV immune]   | 1.26        | 0.72 – 2.23 | 0.420            | 0.69        | 0.21 – 2.18 | 0.523            | 3.23        | 1.09 – 9.57  | <b>0.034</b>     | 2.08        | 0.73 – 5.96 | 0.171            | 1.60                  | 0.37 – 7.04  | 0.532            |
| inf hist DD [DENV]          | 1.25        | 0.82 – 1.89 | 0.296            | 0.91        | 0.44 – 1.88 | 0.801            | 0.38        | 0.05 – 3.00  | 0.359            | 3.25        | 1.65 – 6.41 | <b>0.001</b>     | 0.60                  | 0.13 – 2.81  | 0.515            |
| inf hist DD [ZIKV]          | 1.61        | 1.20 – 2.17 | <b>0.002</b>     | 1.20        | 0.72 – 1.99 | 0.479            | 2.90        | 1.34 – 6.27  | <b>0.007</b>     | 2.62        | 1.48 – 4.63 | <b>0.001</b>     | 2.19                  | 0.99 – 4.83  | 0.053            |
| inf hist DD [DENV-DENV]     | 1.96        | 1.05 – 3.66 | <b>0.036</b>     | 2.45        | 0.97 – 6.20 | 0.058            | 2.20        | 0.25 – 19.20 | 0.476            | 2.58        | 0.81 – 8.26 | 0.109            | 6.79                  | 1.88 – 24.58 | <b>0.003</b>     |
| inf hist DD [DENV-ZIKV]     | 1.43        | 0.90 – 2.29 | 0.131            | 0.76        | 0.30 – 1.93 | 0.567            | 0.00        | 0.00 – Inf   | 0.984            | 3.96        | 1.93 – 8.12 | <b>&lt;0.001</b> | 3.46                  | 1.24 – 9.65  | <b>0.018</b>     |
| inf hist DD [ZIKV-DENV]     | 0.79        | 0.47 – 1.34 | 0.384            | 0.48        | 0.19 – 1.24 | 0.130            | 1.76        | 0.43 – 7.13  | 0.431            | 1.60        | 0.68 – 3.76 | 0.282            | 0.82                  | 0.18 – 3.69  | 0.797            |
| inf hist DD [2+DENV]        | 0.37        | 0.09 – 1.50 | 0.164            | 0.39        | 0.05 – 2.94 | 0.364            | 0.00        | 0.00 – Inf   | 0.991            | 0.78        | 0.10 – 5.98 | 0.815            | 1.37                  | 0.17 – 11.06 | 0.768            |
| inf hist DD [2+DENV-ZIKV]   | 1.28        | 0.56 – 2.92 | 0.563            | 0.46        | 0.06 – 3.50 | 0.454            | 2.62        | 0.30 – 23.26 | 0.387            | 2.56        | 0.72 – 9.06 | 0.146            | 2.85                  | 0.54 – 15.01 | 0.217            |
| inf hist.DDDENV-ZIKV-2+DENV | 0.00        | 0.00 – Inf  | 0.986            | 0.00        | 0.00 – Inf  | 0.992            | 0.00        | 0.00 – Inf   | 0.998            | 0.00        | 0.00 – Inf  | 0.992            | 0.00                  | 0.00 – Inf   | 0.995            |
| age                         | 1.04        | 1.00 – 1.08 | <b>0.029</b>     | 1.05        | 0.98 – 1.12 | 0.150            | 0.98        | 0.88 – 1.09  | 0.687            | 1.07        | 1.01 – 1.14 | <b>0.023</b>     | 1.07                  | 0.98 – 1.18  | 0.141            |
| sex [M]                     | 0.94        | 0.77 – 1.14 | 0.525            | 1.26        | 0.89 – 1.77 | 0.193            | 1.14        | 0.66 – 1.97  | 0.634            | 0.67        | 0.47 – 0.95 | <b>0.025</b>     | 0.62                  | 0.37 – 1.04  | 0.069            |
| time per imm class          | 1.00        | 0.95 – 1.05 | 0.910            | 0.99        | 0.91 – 1.08 | 0.841            | 1.12        | 0.98 – 1.29  | 0.100            | 0.96        | 0.88 – 1.05 | 0.391            | 1.06                  | 0.94 – 1.20  | 0.369            |
| Observations                | 3411        |             |                  | 3411        |             |                  | 3411        |              |                  | 3411        |             |                  | 3411                  |              |                  |
| R <sup>2</sup> Nagelkerke   | 0.033       |             |                  | 0.022       |             |                  | 0.053       |              |                  | 0.071       |             |                  | 0.087                 |              |                  |

**Table S3. Estimated risk ratios of a dengue case by prior DENV and ZIKV infection histories, 2004-2023**

| Predictors                                           | DENV1 Case            |                         |                  | DENV2 Case  |                         |                  | DENV3 Case  |                         |                  | DENV4 Case            |                         |                  | DwSSSD                |                         |                  |
|------------------------------------------------------|-----------------------|-------------------------|------------------|-------------|-------------------------|------------------|-------------|-------------------------|------------------|-----------------------|-------------------------|------------------|-----------------------|-------------------------|------------------|
|                                                      | Incidence Rate Ratios | CI                      | P                | Risk Ratios | CI                      | P                | Risk Ratios | CI                      | P                | Incidence Rate Ratios | CI                      | P                | Incidence Rate Ratios | CI                      | P                |
| (Intercept)                                          | 0.00                  | 0.00-0.01               | <b>&lt;0.001</b> | 0.00        | 0.00-0.00               | <b>&lt;0.001</b> | 0.00        | 0.00-0.00               | <b>&lt;0.001</b> | 0.00                  | 0.00-0.00               | <b>&lt;0.001</b> | 0.00                  | 0.00-0.00               | <b>&lt;0.001</b> |
| inf hist DD [DENV immune]                            | 1.04                  | 0.87-1.25               | 0.649            | 0.57        | 0.38-0.86               | <b>0.008</b>     | 1.84        | 1.33-2.55               | <b>&lt;0.001</b> | 0.99                  | 0.71-1.40               | 0.973            | 2.65                  | 1.03-6.83               | <b>0.044</b>     |
| inf hist DD [DENV]                                   | 1.17                  | 0.94-1.45               | 0.160            | 0.80        | 0.51-1.27               | 0.346            | 2.09        | 1.44-3.05               | <b>&lt;0.001</b> | 0.78                  | 0.48-1.29               | 0.341            | 3.28                  | 1.64-6.57               | <b>0.001</b>     |
| inf hist DD [ZIKV]                                   | 1.87                  | 1.54-2.27               | <b>&lt;0.001</b> | 1.04        | 0.66-1.63               | 0.856            | 3.62        | 2.60-5.04               | <b>&lt;0.001</b> | 2.60                  | 1.39-4.85               | <b>0.003</b>     | 2.66                  | 1.49-4.76               | <b>0.001</b>     |
| inf hist DD [DENV;DENV]                              | 1.45                  | 1.03-2.04               | <b>0.035</b>     | 1.37        | 0.72-2.61               | 0.335            | 0.37        | 0.09-1.51               | 0.164            | 2.40                  | 1.37-4.23               | <b>0.002</b>     | 2.64                  | 0.80-8.68               | 0.110            |
| inf hist DD [DENV;ZIKV]                              | 1.47                  | 1.09-1.99               | <b>0.012</b>     | 0.57        | 0.24-1.37               | 0.210            | 2.53        | 1.64-3.91               | <b>&lt;0.001</b> | 0.00                  | 0.00-Inf                | 0.997            | 4.05                  | 1.93-8.49               | <b>&lt;0.001</b> |
| inf hist DD [ZIKV;DENV]                              | 0.85                  | 0.55-1.34               | 0.490            | 0.42        | 0.18-1.02               | 0.055            | 0.00        | 0.00-Inf                | 0.990            | 1.47                  | 0.47-4.66               | 0.510            | 1.67                  | 0.70-4.00               | 0.249            |
| inf hist DD (2+DENV)                                 | 0.64                  | 0.48-0.86               | <b>0.003</b>     | 0.41        | 0.22-0.79               | <b>0.008</b>     | 0.55        | 0.28-1.09               | 0.086            | 0.96                  | 0.60-1.56               | 0.883            | 0.76                  | 0.10-5.86               | 0.790            |
| inf hist DD (2+DENV;ZIKV)                            | 0.82                  | 0.44-1.54               | 0.533            | 0.32        | 0.04-2.36               | 0.263            | 0.45        | 0.14-1.46               | 0.183            | 2.33                  | 0.30-18.05              | 0.418            | 2.60                  | 0.71-9.56               | 0.151            |
| inf hist DDDENV;ZIKV; 2+DENV                         | 0.00                  | 0.00-Inf                | 0.999            | 0.00        | 0.00-Inf                | 1.000            | 0.00        | 0.00-Inf                | 1.000            | 0.00                  | 0.00-Inf                | 1.000            | 0.00                  | 0.00-Inf                | 1.000            |
| age                                                  | 1.05                  | 1.03-1.08               | <b>&lt;0.001</b> | 1.10        | 1.05-1.16               | <b>&lt;0.001</b> | 1.09        | 1.05-1.12               | <b>&lt;0.001</b> | 0.98                  | 0.93-1.04               | 0.542            | 1.08                  | 1.01-1.14               | <b>0.020</b>     |
| sex [M]                                              | 0.90                  | 0.81-1.00               | 0.052            | 0.97        | 0.77-1.23               | 0.827            | 1.04        | 0.88-1.23               | 0.666            | 0.88                  | 0.70-1.11               | 0.288            | 0.69                  | 0.49-0.99               | <b>0.042</b>     |
| time per imm class                                   | 1.01                  | 0.98-1.04               | 0.421            | 1.01        | 0.96-1.08               | 0.627            | 1.00        | 0.95-1.06               | 0.968            | 1.09                  | 1.01-1.18               | <b>0.020</b>     | 0.97                  | 0.88-1.06               | 0.482            |
| cohort year [2005]                                   | 3.53                  | 2.01-6.22               | <b>&lt;0.001</b> | 2.58        | 1.16-5.73               | <b>0.020</b>     | 8.03        | 2.44-26.41              | <b>0.001</b>     | 0.94                  | 0.00-Inf                | 1.000            | 0.00                  | 0.00-Inf                | 1.000            |
| cohort year [2006]                                   | 0.73                  | 0.34-1.53               | 0.399            | 0.09        | 0.01-0.76               | <b>0.027</b>     | 2.61        | 0.70-9.64               | 0.151            | 0.90                  | 0.00-Inf                | 1.000            | 0.00                  | 0.00-Inf                | 1.000            |
| cohort year [2007]                                   | 3.58                  | 2.03-6.32               | <b>&lt;0.001</b> | 0.09        | 0.01-0.74               | <b>0.025</b>     | 19.11       | 5.96-61.28              | <b>&lt;0.001</b> | 0.86                  | 0.00-Inf                | 1.000            | 0.00                  | 0.00-Inf                | 1.000            |
| cohort year [2008]                                   | 1.12                  | 0.58-2.18               | 0.729            | 0.00        | 0.00-Inf                | 1.000            | 0.56        | 0.09-3.40               | 0.532            | 378254773.16          | 0.00-Inf                | 0.997            | 0.00                  | 0.00-Inf                | 1.000            |
| cohort year [2009]                                   | 7.80                  | 4.54-13.39              | <b>&lt;0.001</b> | 1.18        | 0.49-2.83               | 0.711            | 2.54        | 0.68-9.52               | 0.166            | 2448918720.52         | 0.00-Inf                | 0.997            | 0.00                  | 0.00-Inf                | 1.000            |
| cohort year [2010]                                   | 4.67                  | 2.67-8.16               | <b>&lt;0.001</b> | 0.00        | 0.00-Inf                | 1.000            | 4.61        | 1.32-16.06              | <b>0.016</b>     | 1320414787.55         | 0.00-Inf                | 0.997            | 0.00                  | 0.00-Inf                | 1.000            |
| cohort year [2011]                                   | 1.46                  | 0.76-2.79               | 0.255            | 0.31        | 0.09-1.06               | 0.063            | 0.00        | 0.00-Inf                | 0.985            | 361967558.36          | 0.00-Inf                | 0.997            | 0.00                  | 0.00-Inf                | 1.000            |
| cohort year [2012]                                   | 4.28                  | 2.43-7.54               | <b>&lt;0.001</b> | 5.05        | 2.31-11.04              | <b>&lt;0.001</b> | 0.28        | 0.03-2.73               | 0.273            | 37368050.46           | 0.00-Inf                | 0.997            | 0.00                  | 0.00-Inf                | 1.000            |
| cohort year [2013]                                   | 1.75                  | 0.94-3.27               | 0.080            | 1.28        | 0.53-3.08               | 0.582            | 1.79        | 0.43-7.34               | 0.421            | 77476627.39           | 0.00-Inf                | 0.997            | 1.04                  | 0.06-18.11              | 0.979            |
| cohort year [2014]                                   | 0.58                  | 0.26-1.28               | 0.174            | 0.00        | 0.00-Inf                | 1.000            | 0.30        | 0.03-2.99               | 0.307            | 8811982.30            | 0.00-Inf                | 0.997            | 0.00                  | 0.00-Inf                | 1.000            |
| cohort year [2015]                                   | 1.51                  | 0.80-2.86               | 0.202            | 0.00        | 0.00-Inf                | 1.000            | 7.23        | 2.11-24.78              | <b>0.002</b>     | 0.69                  | 0.00-Inf                | 1.000            | 0.00                  | 0.00-Inf                | 1.000            |
| cohort year [2016]                                   | 1.60                  | 0.85-2.99               | 0.142            | 0.00        | 0.00-Inf                | 0.999            | 2.48        | 0.65-9.45               | 0.184            | 0.69                  | 0.00-Inf                | 1.000            | 0.00                  | 0.00-Inf                | 1.000            |
| cohort year [2017]                                   | 0.15                  | 0.05-0.44               | <b>0.001</b>     | 0.00        | 0.00-Inf                | 0.999            | 0.00        | 0.00-Inf                | 0.983            | 0.61                  | 0.00-Inf                | 1.000            | 0.00                  | 0.00-Inf                | 0.999            |
| cohort year [2018]                                   | 0.36                  | 0.16-0.81               | <b>0.014</b>     | 0.00        | 0.00-Inf                | 0.999            | 0.44        | 0.09-2.26               | 0.325            | 0.57                  | 0.00-Inf                | 1.000            | 0.00                  | 0.00-Inf                | 0.999            |
| cohort year [2019]                                   | 11.52                 | 6.67-19.89              | <b>&lt;0.001</b> | 0.00        | 0.00-Inf                | 1.000            | 48.67       | 14.75-160.55            | <b>&lt;0.001</b> | 0.55                  | 0.00-Inf                | 1.000            | 0.00                  | 0.00-Inf                | 1.000            |
| cohort year [2020]                                   | 0.19                  | 0.07-0.53               | <b>0.002</b>     | 0.00        | 0.00-Inf                | 0.999            | 0.38        | 0.06-2.35               | 0.297            | 0.58                  | 0.00-Inf                | 1.000            | 0.00                  | 0.00-Inf                | 0.999            |
| cohort year [2021]                                   | 0.12                  | 0.03-0.41               | <b>0.001</b>     | 0.10        | 0.02-0.50               | <b>0.005</b>     | 0.00        | 0.00-Inf                | 0.983            | 0.56                  | 0.00-Inf                | 1.000            | 0.00                  | 0.00-Inf                | 1.000            |
| cohort year [2022]                                   | 13.06                 | 7.49-22.77              | <b>&lt;0.001</b> | 6.76        | 3.00-15.27              | <b>&lt;0.001</b> | 1.60        | 0.40-6.42               | 0.508            | 70588112.68           | 0.00-Inf                | 0.997            | 97.75                 | 11.66-819.56            | <b>&lt;0.001</b> |
| <b>Random Effects</b>                                |                       |                         |                  |             |                         |                  |             |                         |                  |                       |                         |                  |                       |                         |                  |
| $\sigma^2$                                           | 5.05                  |                         | NA               |             |                         | NA               |             |                         | 6.76             |                       | 7.50                    |                  | 0.00                  |                         |                  |
| tau                                                  | 0.00                  | <small>case ids</small> |                  | 0.00        | <small>case ids</small> |                  | 1.00        | <small>case ids</small> |                  | 0.00                  | <small>case ids</small> |                  | 0.00                  | <small>case ids</small> |                  |
| ICC                                                  | 0.00                  |                         |                  |             |                         |                  |             |                         |                  |                       |                         |                  | 0.00                  |                         |                  |
| N                                                    | 9165                  | <small>case ids</small> |                  | 9165        | <small>case ids</small> |                  | 9165        | <small>case ids</small> |                  | 9165                  | <small>case ids</small> |                  | 9165                  | <small>case ids</small> |                  |
| Observations                                         | 66842                 |                         | 67438            |             | 67438                   |                  | 67438       |                         | 67438            |                       | 67438                   |                  | 67438                 |                         | 67438            |
| Marginal R <sup>2</sup> / Conditional R <sup>2</sup> | 0.303 / 0.303         |                         | NA               |             | NA                      |                  | NA          |                         | 0.943 / NA       |                       | 0.909 / 0.909           |                  | 1.000 / 1.000         |                         | 1.000 / 1.000    |





**Table S5. Estimated risk of symptomatic DENV infection by pre-existing DENV iELISA titers, 2022-2023.**

| Predictors                | DENV Case   |             |              | DENV1 Case  |             |              | DENV3 Case  |             |              | DENV4 Case  |             |              | DwWS/SD     |             |              |
|---------------------------|-------------|-------------|--------------|-------------|-------------|--------------|-------------|-------------|--------------|-------------|-------------|--------------|-------------|-------------|--------------|
|                           | Risk Ratios | CI          | P            | Risk Ratios | CI          | P            | Risk Ratios | CI          | P            | Risk Ratios | CI          | P            | Risk Ratios | CI          | P            |
| (Intercept)               | 0.06        | 0.04 – 0.08 | <0.001       | 0.02        | 0.01 – 0.04 | <0.001       | 0.01        | 0.00 – 0.02 | <0.001       | 0.01        | 0.01 – 0.02 | <0.001       | 0.00        | 0.00 – 0.01 | <0.001       |
| gm titers cat [<21]       | 1.62        | 1.21 – 2.17 | <b>0.001</b> | 1.10        | 0.65 – 1.82 | 0.714        | 2.91        | 1.39 – 6.09 | <b>0.005</b> | 2.76        | 1.55 – 4.96 | <b>0.001</b> | 2.16        | 1.01 – 4.61 | <b>0.047</b> |
| gm.titers.cat21-80        | 1.64        | 1.12 – 2.34 | <b>0.009</b> | 1.27        | 0.66 – 2.32 | 0.459        | 1.90        | 0.69 – 5.26 | 0.215        | 3.59        | 1.84 – 6.89 | <0.001       | 1.67        | 0.59 – 4.23 | 0.305        |
| gm.titers.cat81-320       | 1.39        | 0.92 – 2.06 | 0.106        | 0.79        | 0.35 – 1.61 | 0.542        | 0.68        | 0.15 – 3.21 | 0.629        | 4.22        | 2.18 – 8.11 | <0.001       | 1.80        | 0.62 – 4.71 | 0.254        |
| gm.titers.cat321-1280     | 1.10        | 0.69 – 1.70 | 0.670        | 0.72        | 0.31 – 1.54 | 0.430        | 1.08        | 0.28 – 4.18 | 0.906        | 3.07        | 1.46 – 6.28 | <b>0.003</b> | 2.26        | 0.82 – 5.79 | 0.102        |
| gm titers cat [>1280]     | 0.68        | 0.41 – 1.11 | 0.134        | 0.38        | 0.14 – 0.91 | <b>0.041</b> | 0.00        | 0.00 – Inf  | 0.984        | 2.08        | 0.94 – 4.49 | 0.067        | 0.69        | 0.17 – 2.32 | 0.572        |
| age                       | 1.04        | 1.00 – 1.07 | <b>0.040</b> | 1.05        | 0.99 – 1.12 | 0.113        | 1.00        | 0.90 – 1.10 | 0.961        | 1.05        | 0.99 – 1.11 | 0.084        | 1.10        | 1.01 – 1.19 | <b>0.032</b> |
| sex [M]                   | 0.91        | 0.74 – 1.10 | 0.326        | 1.21        | 0.86 – 1.71 | 0.272        | 1.10        | 0.64 – 1.91 | 0.719        | 0.66        | 0.46 – 0.93 | <b>0.020</b> | 0.62        | 0.37 – 1.01 | 0.060        |
| time per imm class        | 1.01        | 0.97 – 1.06 | 0.614        | 0.99        | 0.92 – 1.07 | 0.832        | 1.09        | 0.97 – 1.23 | 0.165        | 1.01        | 0.93 – 1.08 | 0.891        | 1.05        | 0.94 – 1.16 | 0.378        |
| Observations              | 3499        |             |              | 3499        |             |              | 3499        |             |              | 3499        |             |              | 3499        |             |              |
| R <sup>2</sup> Nagelkerke | 0.027       |             |              | 0.015       |             |              | 0.056       |             |              | 0.059       |             |              | 0.048       |             |              |

**Table S6. Estimated risk of symptomatic DENV infection by pre-existing DENV iELISA titers, 2004-2023.**

| Predictors                         | DENV Case   |              |              | DENV1 Case  |              |              | DENV2 Case            |                |              | DENV3 Case   |             |              | DENV4 Case            |                |              | DwWS/SD     |                |              |
|------------------------------------|-------------|--------------|--------------|-------------|--------------|--------------|-----------------------|----------------|--------------|--------------|-------------|--------------|-----------------------|----------------|--------------|-------------|----------------|--------------|
|                                    | Risk Ratios | CI           | p            | Risk Ratios | CI           | p            | Incidence Rate Ratios | CI             | p            | Risk Ratios  | CI          | p            | Incidence Rate Ratios | CI             | p            | Risk Ratios | CI             | p            |
| (Intercept)                        | 0.00        | 0.00 – 0.01  | <0.001       | 0.00        | 0.00 – 0.00  | <0.001       | 0.00                  | 0.00 – 0.00    | <0.001       | 0.00         | 0.00 – 0.00 | 0.994        | 0.00 – 0.00           | <0.001         | 0.00         | 0.00 – 0.00 | <0.001         |              |
| gm titers cat [ $<21$ ]            | 1.37        | 1.15 – 1.63  | <0.001       | 0.89        | 0.61 – 1.31  | 0.560        | 1.71                  | 1.19 – 2.45    | <b>0.003</b> | 1.67         | 1.16 – 2.42 | <b>0.006</b> | 2.90                  | 1.61 – 5.22    | <0.001       | 1.83        | 1.27 – 2.64    | <b>0.001</b> |
| gm.titers.cat21-80                 | 1.62        | 1.37 – 1.92  | <0.001       | 0.95        | 0.64 – 1.40  | 0.796        | 3.32                  | 2.47 – 4.48    | <0.001       | 1.22         | 0.84 – 1.77 | 0.286        | 3.59                  | 1.83 – 7.03    | <0.001       | 2.97        | 2.15 – 4.10    | <0.001       |
| gm.titers.cat81-320                | 1.33        | 1.12 – 1.58  | <b>0.001</b> | 0.62        | 0.41 – 0.95  | <b>0.028</b> | 2.71                  | 2.01 – 3.67    | <0.001       | 0.94         | 0.64 – 1.38 | 0.767        | 4.45                  | 2.29 – 8.65    | <0.001       | 2.34        | 1.67 – 3.27    | <0.001       |
| gm.titers.cat321-1280              | 0.96        | 0.77 – 1.20  | 0.721        | 0.35        | 0.19 – 0.63  | <0.001       | 2.24                  | 1.57 – 3.19    | <0.001       | 0.51         | 0.29 – 0.90 | <b>0.019</b> | 3.14                  | 1.50 – 6.58    | <b>0.002</b> | 1.68        | 1.12 – 2.53    | <b>0.013</b> |
| gm titers cat [ $>1280$ ]          | 0.64        | 0.48 – 0.84  | <b>0.002</b> | 0.25        | 0.12 – 0.52  | <0.001       | 0.99                  | 0.59 – 1.66    | 0.958        | 0.44         | 0.20 – 0.94 | <b>0.034</b> | 2.13                  | 0.96 – 4.71    | 0.062        | 1.02        | 0.59 – 1.76    | 0.932        |
| age                                | 1.06        | 1.04 – 1.08  | <0.001       | 1.11        | 1.06 – 1.17  | <0.001       | 1.08                  | 1.04 – 1.11    | <0.001       | 1.01         | 0.96 – 1.06 | 0.672        | 1.05                  | 0.99 – 1.11    | 0.078        | 1.08        | 1.05 – 1.12    | <0.001       |
| sex [M]                            | 0.88        | 0.79 – 0.98  | <b>0.015</b> | 0.94        | 0.75 – 1.19  | 0.620        | 1.01                  | 0.84 – 1.21    | 0.951        | 0.88         | 0.70 – 1.10 | 0.262        | 0.68                  | 0.48 – 0.97    | <b>0.034</b> | 0.81        | 0.66 – 0.99    | <b>0.039</b> |
| time per imm class                 | 1.00        | 0.98 – 1.03  | 0.759        | 1.00        | 0.94 – 1.05  | 0.892        | 0.98                  | 0.94 – 1.03    | 0.483        | 1.06         | 1.00 – 1.13 | 0.071        | 1.01                  | 0.94 – 1.09    | 0.757        | 1.01        | 0.96 – 1.06    | 0.773        |
| cohort year [2005]                 | 3.50        | 1.99 – 6.14  | <0.001       | 2.61        | 1.18 – 5.77  | <b>0.018</b> | 7.80                  | 2.37 – 25.74   | <b>0.001</b> | 0.00         | 0.00 – Inf  | 1.000        | 0.00                  | 0.00 – Inf     | 0.999        | 1.69        | 0.15 – 18.65   | 0.668        |
| cohort year [2006]                 | 0.70        | 0.34 – 1.48  | 0.354        | 0.10        | 0.01 – 0.76  | <b>0.027</b> | 2.47                  | 0.67 – 9.13    | 0.176        | 0.00         | 0.00 – Inf  | 1.000        | 0.00                  | 0.00 – Inf     | 1.000        | 0.78        | 0.05 – 12.48   | 0.861        |
| cohort year [2007]                 | 3.40        | 1.94 – 5.96  | <0.001       | 0.09        | 0.01 – 0.72  | <b>0.023</b> | 17.01                 | 5.31 – 54.45   | <0.001       | 0.00         | 0.00 – Inf  | 1.000        | 0.00                  | 0.00 – Inf     | 1.000        | 11.85       | 1.56 – 89.82   | <b>0.017</b> |
| cohort year [2008]                 | 1.05        | 0.55 – 2.03  | 0.876        | 0.00        | 0.00 – Inf   | 0.995        | 0.51                  | 0.09 – 3.09    | 0.467        | 136901815.68 | 0.00 – Inf  | 0.996        | 0.00                  | 0.00 – Inf     | 0.999        | 3.49        | 0.41 – 29.96   | 0.255        |
| cohort year [2009]                 | 7.28        | 4.28 – 12.38 | <0.001       | 1.16        | 0.49 – 2.74  | 0.731        | 2.19                  | 0.59 – 8.16    | 0.242        | 915708882.92 | 0.00 – Inf  | 0.995        | 0.00                  | 0.00 – Inf     | 1.000        | 43.85       | 6.06 – 317.38  | <0.001       |
| cohort year [2010]                 | 4.36        | 2.52 – 7.55  | <0.001       | 0.00        | 0.00 – Inf   | 0.995        | 4.00                  | 1.16 – 13.81   | <b>0.028</b> | 486842043.10 | 0.00 – Inf  | 0.995        | 0.00                  | 0.00 – Inf     | 0.999        | 17.43       | 2.36 – 128.92  | <b>0.005</b> |
| cohort year [2011]                 | 1.36        | 0.72 – 2.57  | 0.346        | 0.31        | 0.09 – 1.03  | 0.055        | 0.00                  | 0.00 – Inf     | 0.999        | 128772175.51 | 0.00 – Inf  | 0.996        | 0.00                  | 0.00 – Inf     | 1.000        | 3.70        | 0.43 – 31.86   | 0.234        |
| cohort year [2012]                 | 4.04        | 2.33 – 7.02  | <0.001       | 5.02        | 2.37 – 10.65 | <0.001       | 0.25                  | 0.03 – 2.47    | 0.238        | 13462059.59  | 0.00 – Inf  | 0.996        | 0.00                  | 0.00 – Inf     | 0.999        | 13.74       | 1.83 – 103.04  | <b>0.011</b> |
| cohort year [2013]                 | 1.71        | 0.93 – 3.16  | 0.085        | 1.34        | 0.57 – 3.13  | 0.498        | 1.69                  | 0.42 – 6.85    | 0.461        | 28828392.88  | 0.00 – Inf  | 0.996        | 0.87                  | 0.05 – 14.15   | 0.923        | 8.69        | 1.12 – 67.38   | <b>0.039</b> |
| cohort year [2014]                 | 0.58        | 0.26 – 1.27  | 0.172        | 0.00        | 0.00 – Inf   | 0.996        | 0.30                  | 0.03 – 2.91    | 0.299        | 22172025.15  | 0.00 – Inf  | 0.996        | 0.00                  | 0.00 – Inf     | 1.000        | 0.00        | 0.00 – Inf     | 0.999        |
| cohort year [2015]                 | 1.56        | 0.84 – 2.91  | 0.160        | 0.00        | 0.00 – Inf   | 0.995        | 7.59                  | 2.26 – 25.53   | <b>0.001</b> | 0.00         | 0.00 – Inf  | 1.000        | 0.00                  | 0.00 – Inf     | 1.000        | 3.84        | 0.44 – 33.17   | 0.221        |
| cohort year [2016]                 | 1.70        | 0.92 – 3.14  | 0.088        | 0.00        | 0.00 – Inf   | 0.995        | 2.83                  | 0.76 – 10.61   | 0.122        | 0.00         | 0.00 – Inf  | 1.000        | 0.00                  | 0.00 – Inf     | 0.999        | 0.00        | 0.00 – Inf     | 0.999        |
| cohort year [2017]                 | 0.19        | 0.06 – 0.56  | <b>0.003</b> | 0.00        | 0.00 – Inf   | 0.995        | 0.00                  | 0.00 – Inf     | 0.999        | 0.00         | 0.00 – Inf  | 1.000        | 0.00                  | 0.00 – Inf     | 0.999        | 0.00        | 0.00 – Inf     | 0.999        |
| cohort year [2018]                 | 0.46        | 0.20 – 1.02  | 0.055        | 0.00        | 0.00 – Inf   | 0.995        | 0.75                  | 0.15 – 3.76    | 0.732        | 0.00         | 0.00 – Inf  | 1.000        | 0.00                  | 0.00 – Inf     | 0.999        | 0.00        | 0.00 – Inf     | 0.999        |
| cohort year [2019]                 | 14.44       | 8.58 – 24.31 | <0.001       | 0.00        | 0.00 – Inf   | 0.995        | 64.24                 | 20.40 – 202.35 | <0.001       | 0.02         | 0.00 – Inf  | 1.000        | 0.00                  | 0.00 – Inf     | 0.999        | 91.08       | 12.67 – 654.66 | <0.001       |
| cohort year [2020]                 | 0.23        | 0.08 – 0.64  | <b>0.005</b> | 0.00        | 0.00 – Inf   | 0.995        | 0.47                  | 0.08 – 2.85    | 0.414        | 0.00         | 0.00 – Inf  | 1.000        | 0.00                  | 0.00 – Inf     | 1.000        | 0.00        | 0.00 – Inf     | 1.000        |
| cohort year [2021]                 | 0.14        | 0.04 – 0.49  | <b>0.002</b> | 0.11        | 0.02 – 0.55  | <b>0.007</b> | 0.00                  | 0.00 – Inf     | 0.999        | 0.02         | 0.00 – Inf  | 1.000        | 0.00                  | 0.00 – Inf     | 1.000        | 0.00        | 0.00 – Inf     | 0.999        |
| cohort year [2022]                 | 15.37       | 9.07 – 26.04 | <0.001       | 7.42        | 3.48 – 15.81 | <0.001       | 1.97                  | 0.51 – 7.57    | 0.322        | 317888094.00 | 0.00 – Inf  | 0.995        | 93.98                 | 12.72 – 694.26 | <0.001       | 37.86       | 5.18 – 276.75  | <0.001       |
| <b>Random Effects</b>              |             |              |              |             |              |              |                       |                |              |              |             |              |                       |                |              |             |                |              |
| $\sigma^2$                         | NA          |              |              | NA          |              |              | 6.32                  |                |              | NA           |             |              | 7.59                  |                |              | NA          |                |              |
| $\tau_{00}$                        | 0.00        | case.ids     |              | 0.00        | case.ids     |              | 0.00                  | case.ids       |              | 0.00         | case.ids    |              | 0.00                  | case.ids       |              | 0.00        | case.ids       |              |
| ICC                                |             |              |              |             |              |              | 0.00                  |                |              |              |             |              |                       |                |              |             |                |              |
| N                                  | 9164        | case.ids     |              | 9164        | case.ids     |              | 9164                  | case.ids       |              | 9164         | case.ids    |              | 9164                  | case.ids       |              | 9164        | case.ids       |              |
| Observations                       | 67030       |              |              | 67638       |              |              | 67638                 |                |              | 67638        |             |              | 67638                 |                |              | 67638       |                |              |
| Marginal $R^2$ / Conditional $R^2$ | NA          |              |              | NA          |              |              | 0.915 / 0.915         |                |              | NA           |             |              | 0.899 / 0.899         |                |              | NA          |                |              |

**Table S7. Half-lives of antibody titers for a given infection history, 2004-2023.**

| Infection History | Average titer magnitude at 1 year post last infection* | Slope(s)**                    | 95% Confidence Intervals                                | Half-lives ***        | Inflection Point(s)**** |
|-------------------|--------------------------------------------------------|-------------------------------|---------------------------------------------------------|-----------------------|-------------------------|
| DENV Immune       | 2.48[2.44,2.52]                                        | <b>-0.12</b><br>0.04          | <b>(-0.12, -0.11)</b><br>(-0.002, 0.07)                 | 5.78<br>-17.33        | 8.79                    |
| DENV              | 1.87[1.83,1.92]                                        | 0.02<br><b>-0.05</b>          | (-0.04, 0.08)<br><b>(-0.06, -0.03)</b>                  | -34.66<br>13.86       | 2.3                     |
| ZIKV              | 0.85[0.81,0.89]                                        | <b>0.30</b><br><b>-0.19</b>   | <b>(0.28, 0.33)</b><br><b>(-0.23, -0.16)</b>            | -2.31<br>3.65         | 3.2                     |
| DENV-DENV         | 2.71[2.61,2.80]                                        | <b>-0.40</b><br><b>-0.04</b>  | <b>(-0.55, -0.26)</b><br><b>(-0.16, -0.02)</b>          | 1.73<br>17.33         | 2.31                    |
| DENV-ZIKV         | 3.01[2.98,3.13]                                        | <b>-0.08</b><br>-0.18         | <b>(-0.11, -0.05)</b><br>(-0.89, 0.53)                  | 8.66<br>3.85          | 5                       |
| ZIKV-DENV         | 3.34[3.25,3.44]                                        | <b>-0.28</b>                  | <b>(-0.35, -0.21)</b>                                   | 2.48                  | None                    |
| 2+DENV            | 2.96[2.90,3.01]                                        | <b>-0.36</b><br><b>-0.03</b>  | <b>(-0.44, -0.29)</b><br><b>(-0.05, -0.02)</b>          | 1.93<br>23.10         | 2.3                     |
| 2+DENV-ZIKV       | 3.56[3.44,3.67]                                        | <b>-0.41</b><br>0.16<br>-0.23 | <b>(-0.58, -0.23)</b><br>(-0.05, 0.37)<br>(-0.49, 0.03) | 1.69<br>-4.33<br>3.01 | 2.4<br>4.4              |

\*Predicted log<sub>10</sub>(DENV iELISA titer) and confidence intervals at 1 year after last infection.

\*\* log<sub>10</sub>(DENV iELISA titer)/year. Significant slopes are bolded.

\*\*\*Half-lives were calculated by computing log(2) divided by slope (log(2)/slope). Negative half-lives indicate an increase in titer magnitude.

\*\*\*\* Inflection points were calculated in years
